# Supplementary material
Source: PubMed Central journal article supplement (PMC10319913)
Supplement: NIHMS1883666-supplement-2.pdf [file NIHMS1883666-supplement-2.pdf]

## SUPPLEMENTARY INFORMATION

# Imaging Nociceptive Opioid Peptide Receptors in Alcohol Use Disorders With [<sup>11</sup>C]NOP-1A and Positron Emission Tomography: Findings From a Second Cohort

Tollefson *et al.*

### Contents

Tables S1-S6

Supplement Analyses

Figures S1-S3

Supplement References

**Table S1. MRI based volume of regions of interest (mm<sup>3</sup>)**

|                                | Alcohol use disorders<br>(n=27) |      | Healthy controls<br>(n=27) |       |
|--------------------------------|---------------------------------|------|----------------------------|-------|
|                                | Mean                            | SD   | Mean                       | SD    |
| Amygdala                       | 2092                            | 308  | 2126                       | 307   |
| Hippocampus                    | 4258                            | 593  | 4437                       | 609   |
| Midbrain                       | 6216                            | 822  | 6568                       | 935   |
| Ventral Striatum               | 825                             | 164  | 777                        | 106   |
| Caudate                        | 7002                            | 960  | 7267                       | 859   |
| Putamen                        | 7962                            | 1008 | 8259                       | 684   |
| Dorsolateral Prefrontal Cortex | 74462                           | 9769 | 77715                      | 11058 |
| Orbital Frontal Cortex         | 45077                           | 5769 | 44692                      | 6931  |
| Medial Prefrontal Cortex       | 19005                           | 3873 | 20164                      | 3906  |
| Anterior Cingulate Cortex      | 17674                           | 4376 | 16592                      | 3326  |
| Cerebellum                     | 71432                           | 9532 | 71246                      | 10251 |

**Table S2. Effect of tobacco use status on [<sup>11</sup>C]NOP-1A V<sub>T</sub> in Alcohol use disorders and Healthy controls**

| Region                         | Tobacco | Alcohol use disorders |      | Healthy controls |      |
|--------------------------------|---------|-----------------------|------|------------------|------|
|                                |         | 12 Yes/15 No          |      | 15 Yes/12 No     |      |
|                                |         | Mean                  | SD   | Mean             | SD   |
| Amygdala                       | Yes     | 16.46                 | 4.21 | 15.55            | 2.13 |
|                                | No      | 14.60                 | 3.20 | 14.80            | 2.37 |
| Hippocampus                    | Yes     | 12.23                 | 2.85 | 11.31            | 1.41 |
|                                | No      | 10.45                 | 2.21 | 10.82            | 1.73 |
| Midbrain                       | Yes     | 9.77                  | 2.22 | 8.95             | 0.95 |
|                                | No      | 8.33                  | 1.77 | 8.62             | 1.39 |
| Ventral striatum               | Yes     | 15.70                 | 3.75 | 14.30            | 1.79 |
|                                | No      | 13.54                 | 2.81 | 14.10            | 2.00 |
| Caudate                        | Yes     | 12.90                 | 3.04 | 11.96            | 1.62 |
|                                | No      | 11.03                 | 2.14 | 11.58            | 1.39 |
| Putamen                        | Yes     | 15.39                 | 3.64 | 13.70            | 1.66 |
|                                | No      | 12.81                 | 2.66 | 13.28            | 1.94 |
| Dorsolateral prefrontal cortex | Yes     | 14.22                 | 3.26 | 13.31            | 1.68 |
|                                | No      | 12.51                 | 2.76 | 12.76            | 1.91 |
| Orbitofrontal cortex           | Yes     | 14.58                 | 3.38 | 13.81            | 1.80 |
|                                | No      | 12.87                 | 2.86 | 13.27            | 2.03 |
| Medial prefrontal cortex       | Yes     | 14.21                 | 3.23 | 13.36            | 1.63 |
|                                | No      | 12.47                 | 2.74 | 12.77            | 1.69 |
| Anterior cingulate cortex      | Yes     | 14.78                 | 3.31 | 13.80            | 1.62 |
|                                | No      | 12.97                 | 2.77 | 13.27            | 1.94 |
| Cerebellum                     | Yes     | 8.76                  | 1.97 | 7.97             | 0.88 |
|                                | No      | 7.49                  | 1.58 | 7.89             | 1.25 |

Unpaired t-tests in all regions comparing V<sub>T</sub> in tobacco users vs. non-users were p > 0.05 in both the AUD and HC groups. However, differences in V<sub>T</sub> between tobacco users vs. non-users in the AUD group were at a statistical trend (p < 0.1) in the hippocampus, midbrain, caudate, putamen and cerebellum.

**Table S3. Clinical characteristics of AUD subjects based on follow-up outcome**

|                                                      | Abstained<br>(n=6) | Relapsed<br>(n=8) | Dropped out<br>(n=8) |
|------------------------------------------------------|--------------------|-------------------|----------------------|
| Males (n)                                            | 1                  | 1                 | 1                    |
| Tobacco use (n)                                      | 5                  | 3                 | 3                    |
| Comorbid psychiatric disorders (n)<br>(GAD or PTSD)  | 2                  | 1                 | 1                    |
| Comorbid pain<br>Disorders (n)                       | 1                  | 1                 | 2                    |
| Psychotropic<br>Medications (n)                      | 2                  | 3                 | 3                    |
| Hair ETG $\geq$ 30 pg/mg (n)                         | 2                  | 7†                | 4                    |
| Hair ETG < 30 pg/mg (n)                              | 4                  | 0                 | 4                    |
| Alcohol Dependence Scale<br>(range 0 to 47)          | 23 $\pm$ 10        | 18 $\pm$ 6        | 19 $\pm$ 3           |
| Penn Alcohol Craving Scale<br>(range 0 to 30)        | 17 $\pm$ 8         | 14 $\pm$ 7        | 16 $\pm$ 10          |
| Duration abstinent from alcohol before PET<br>(days) | 47 $\pm$ 32        | 18 $\pm$ 12       | 25 $\pm$ 12          |

† Hair from one subject was unavailable

**Table S4. Pearson correlation coefficient (r) for relationships between ROI  $V_T$  and total money earned in contingency management paradigm** (data is from n=19 subjects as three AUD are excluded for completing part of the follow-up in an honor system via phone due to COVID19 pandemic).

| Region                         |   |         |
|--------------------------------|---|---------|
| Amygdala                       | r | 0.620   |
|                                | p | 0.00462 |
| Hippocampus                    | r | 0.695   |
|                                | p | < 0.001 |
| Midbrain                       | r | 0.686   |
|                                | p | 0.001   |
| Ventral Striatum               | r | 0.686   |
|                                | p | 0.001   |
| Caudate                        | r | 0.621   |
|                                | p | 0.00453 |
| Putamen                        | r | 0.627   |
|                                | p | 0.004   |
| Dorsolateral prefrontal cortex | r | 0.699   |
|                                | p | < 0.001 |
| Orbitofrontal cortex           | r | 0.719   |
|                                | p | < 0.001 |
| Medial prefrontal cortex       | r | 0.664   |
|                                | p | 0.002   |
| Anterior Cingulate Cortex      | r | 0.674   |
|                                | p | 0.002   |
| Cerebellum                     | r | 0.659   |
|                                | p | 0.002   |

p is the p-value for r

p < 0.00454 is significant after Bonferroni correction for n=11 ROIs (0.05/11)

**Table S5. Partial correlations (r) for relationships between ROI  $V_T$  and total money earned in contingency management paradigm after controlling for heavy drinking status (hair ETG +/-) (data is from n=18 subjects, three AUD were excluded for completing part of the follow-up in an honor system via phone due to COVID19 pandemic and one AUD was excluded for not having hair ETG).**

| Region                         |   |       |
|--------------------------------|---|-------|
| Amygdala                       | r | 0.562 |
|                                | p | 0.019 |
| Hippocampus                    | r | 0.641 |
|                                | p | 0.006 |
| Midbrain                       | r | 0.628 |
|                                | p | 0.007 |
| Ventral Striatum               | r | 0.628 |
|                                | p | 0.007 |
| Caudate                        | r | 0.564 |
|                                | p | 0.018 |
| Putamen                        | r | 0.560 |
|                                | p | 0.019 |
| Dorsolateral prefrontal cortex | r | 0.643 |
|                                | p | 0.005 |
| Orbitofrontal cortex           | r | 0.666 |
|                                | p | 0.004 |
| Medial prefrontal cortex       | r | 0.609 |
|                                | p | 0.010 |
| Anterior cingulate cortex      | r | 0.609 |
|                                | p | 0.009 |
| Cerebellum                     | r | 0.602 |
|                                | p | 0.011 |

p is the p-value for r

p < 0.00454 is significant after Bonferroni correction for n=11 ROIs (0.05/11)

**Table S6. Partial correlations (r) for relationships between ROI  $V_T$  and total money earned in contingency management paradigm after controlling for the number of abstinent days before PET** (data is from n=19 subjects as three AUD are excluded for completing part of the follow-up in an honor system via phone due to COVID19 pandemic).

| Region                         |   |       |
|--------------------------------|---|-------|
| Amygdala                       | r | 0.574 |
|                                | p | 0.013 |
| Hippocampus                    | r | 0.611 |
|                                | p | 0.007 |
| Midbrain                       | r | 0.609 |
|                                | p | 0.007 |
| Ventral Striatum               | r | 0.610 |
|                                | p | 0.007 |
| Caudate                        | r | 0.537 |
|                                | p | 0.021 |
| Putamen                        | r | 0.546 |
|                                | p | 0.019 |
| Dorsolateral prefrontal cortex | r | 0.632 |
|                                | p | 0.005 |
| Orbitofrontal cortex           | r | 0.652 |
|                                | p | 0.003 |
| Medial prefrontal cortex       | r | 0.594 |
|                                | p | 0.009 |
| Anterior cingulate cortex      | r | 0.593 |
|                                | p | 0.010 |
| Cerebellum                     | r | 0.590 |
|                                | p | 0.010 |

p is the p-value for r

p < 0.00454 is significant after Bonferroni correction for n=11 ROIs (0.05/11)

**Table S7. Partial correlations (r) for the relationships between V<sub>T</sub> and self-reported alcohol use measures after controlling for tobacco use and sex**

| Region V <sub>T</sub>          |   | Controlling r for |                               |                     |                |                               |                     |
|--------------------------------|---|-------------------|-------------------------------|---------------------|----------------|-------------------------------|---------------------|
|                                |   | Tobacco use       |                               |                     | Sex            |                               |                     |
|                                |   | Abstinent Days    | Drinking days in past 30 days | Drinks/drinking day | Abstinent days | Drinking days in past 30 days | Drinks/drinking day |
| Amygdala                       | r | .191              | -.563                         | -.560               | .369           | -.568                         | -.579               |
|                                | p | .349              | .003                          | .003                | .064           | .002                          | .002                |
| Hippocampus                    | r | .360              | -.574                         | -.594               | .521           | -.552                         | -.592               |
|                                | p | .071              | .002                          | .001                | .006           | .003                          | .001                |
| Midbrain                       | r | .301              | -.499                         | -.539               | .475           | -.480                         | -.540               |
|                                | p | .136              | .009                          | .005                | .014           | .013                          | .004                |
| Ventral Striatum               | r | .316              | -.596                         | -.564               | .488           | -.581                         | -.570               |
|                                | p | .116              | .001                          | .003                | .011           | .002                          | .002                |
| Caudate                        | r | .289              | -.502                         | -.525               | .468           | -.483                         | -.527               |
|                                | p | .153              | .009                          | .006                | .016           | .012                          | .006                |
| Putamen                        | r | .271              | -.566                         | -.554               | .467           | -.535                         | -.549               |
|                                | p | .181              | .003                          | .003                | .016           | .005                          | .004                |
| Dorsolateral prefrontal cortex | r | .276              | -.548                         | -.548               | .462           | -.551                         | -.566               |
|                                | p | .173              | .004                          | .004                | .017           | .004                          | .003                |
| Orbitofrontal cortex           | r | .289              | -.618                         | -.594               | .469           | -.620                         | -.612               |
|                                | p | .152              | .001                          | .001                | .016           | .001                          | .001                |
| Medial prefrontal cortex       | r | .267              | -.548                         | -.542               | .450           | -.547                         | -.558               |
|                                | p | .188              | .004                          | .004                | .021           | .004                          | .003                |
| Anterior cingulate cortex      | r | .311              | -.568                         | -.557               | .480           | -.561                         | -.568               |
|                                | p | .122              | .002                          | .003                | .013           | .003                          | .002                |
| Cerebellum                     | r | .255              | -.470                         | -.535               | .427           | -.451                         | -.535               |
|                                | p | .208              | .015                          | .005                | .029           | .021                          | .005                |

p is p-value for r



**Table S8. Basic studies that that have investigated N/OFQ and NOP in human and rodent models of AUD**

| Reference | Species/model       | Study design                                                                                                                                                                                                                            | Region                              | ppN/OFQ                                                                                                                            | NOP                                                    |
|-----------|---------------------|-----------------------------------------------------------------------------------------------------------------------------------------------------------------------------------------------------------------------------------------|-------------------------------------|------------------------------------------------------------------------------------------------------------------------------------|--------------------------------------------------------|
| (1)       | Wistar rats         | <u>Compared alcohol dependent vs. vehicle treated rats</u><br>- 7 days after alcohol was withdrawn<br>- 21 days after alcohol was withdrawn<br>Ethanol dependent rats were administered alcohol (10g/Kg) four times daily for six days. | Bed nucleus of the stria terminalis | No difference                                                                                                                      | <b>Higher</b> at 7 and 21 days after alcohol withdrawn |
|           |                     |                                                                                                                                                                                                                                         | Central nucleus of the amygdala     | <b>Higher</b> at 21 days, but not 7-days after alcohol withdrawn                                                                   | No difference                                          |
|           |                     |                                                                                                                                                                                                                                         | Lateral Hypothalamus                | No difference                                                                                                                      | <b>Higher</b> at 7 and 21 days after alcohol withdrawn |
| (2)       | Sprague-Dawley rats | <u>Compared alcohol administered vs. control rats</u><br>Alcohol (4.5 g/Kg/day) or water (control), administered for 1 day or 5-days. Rat brains examined 30 min after alcohol/water, or 1-, 3- or 7-days of withdrawal                 | Amygdala                            | <b>Higher</b> during alcohol administration (1- and 5-day groups), that persisted during withdrawal on day 1, but not days 3 and 7 | No difference                                          |
|           |                     |                                                                                                                                                                                                                                         | Prefrontal cortex                   | No difference                                                                                                                      | No difference                                          |
| (3)       | C57BL/6J mice       | <u>Alcohol self-administration (SA) vs. controls (water)</u><br>- 4 weeks following alcohol SA                                                                                                                                          | Ventral Tegmental Area              | <b>Lower</b> in the 5-day, but not 21-day withdrawn                                                                                | Not measured                                           |

|     |                                                                                              |                                                                                                                                                                                                 |                                         |                                                     |                                                |
|-----|----------------------------------------------------------------------------------------------|-------------------------------------------------------------------------------------------------------------------------------------------------------------------------------------------------|-----------------------------------------|-----------------------------------------------------|------------------------------------------------|
|     |                                                                                              | <ul style="list-style-type: none"> <li>- 5 days after alcohol SA was withdrawn</li> <li>- 21 days after alcohol SA was withdrawn</li> </ul>                                                     |                                         |                                                     |                                                |
|     |                                                                                              |                                                                                                                                                                                                 | Frontal cortex                          | <b>Lower</b> in the 21-day, but not 5-day withdrawn | Not measured                                   |
|     |                                                                                              |                                                                                                                                                                                                 | Striatum, Amygdala, Periaqueductal gray | No difference                                       | Not measured                                   |
| (4) | Wistar rats bred for high and low ethanol drinking in adolescence (second filial generation) | <u>High vs. low ethanol drinking rats</u><br>High ethanol drinkers 7.7 to 9.2 g/Kg/day<br>Low ethanol drinkers 0.9 to 1.2 g/Kg/day<br>Postmortem brains examined 40 days after last alcohol use | Prefrontal cortex                       | <b>Lower</b> (males > females)                      | <b>Lower</b> (males > females)                 |
|     |                                                                                              |                                                                                                                                                                                                 | Nucleus accumbens                       | No difference                                       | <b>Lower</b> only in males, and not in females |
|     |                                                                                              |                                                                                                                                                                                                 | Ventral tegmental area                  | No difference                                       | No difference                                  |
| (5) | Marchigian Sardinian alcohol-preferring rats (msP)<br><br>Wistar rats (controls)             | <u>Alcohol preferring msP vs Wistar control rats</u><br>Alcohol self-administration following which in situ hybridization and NOP receptor autoradiography were performed                       | Bed nucleus of the stria terminalis     | <b>Higher</b>                                       | <b>Higher</b> (binding, but not mRNA)          |
|     |                                                                                              |                                                                                                                                                                                                 | Central nucleus of the amygdala         | <b>Higher</b>                                       | <b>Higher</b> (binding and mRNA)               |
|     |                                                                                              |                                                                                                                                                                                                 | Medial amygdaloid nucleus               | No difference                                       | <b>Higher</b> (binding, but not mRNA)          |
|     |                                                                                              |                                                                                                                                                                                                 | Basolateral amygdaloid nucleus          | Not measured                                        | <b>Higher</b> (in mRNA, but not binding)       |
|     |                                                                                              |                                                                                                                                                                                                 | Cingulate cortex                        | No difference                                       | <b>Higher</b>                                  |

|     |                   |                                                                                                                                                    |                                     |                                |                                               |
|-----|-------------------|----------------------------------------------------------------------------------------------------------------------------------------------------|-------------------------------------|--------------------------------|-----------------------------------------------|
|     |                   |                                                                                                                                                    |                                     |                                | (binding, but not mRNA)                       |
|     |                   |                                                                                                                                                    | Motor cortex                        | <b>Higher</b>                  | <b>Higher</b><br>(binding and mRNA)           |
|     |                   |                                                                                                                                                    | Nucleus accumbens                   | Not measured                   | <b>Higher</b><br>(binding; mRNA not measured) |
|     |                   |                                                                                                                                                    | Ventral tegmental area              | Not measured                   | <b>Lower</b><br>(binding; mRNA not measured)  |
| (6) | mSP rats          | Chronic intermittent exposure to alcohol for 30 days Vs. water exposed controls<br>Postmortem brains were examined 24-hours after last alcohol use | Amygdala                            | No difference<br>(Trend lower) | <b>Lower</b>                                  |
|     |                   |                                                                                                                                                    | Bed nucleus of the stria terminalis | <b>Lower</b>                   | <b>Higher</b>                                 |
|     | Wistar rats       | Chronic intermittent exposure to alcohol for 30 days Vs. water exposed controls<br>Postmortem brains were examined 24-hours after last alcohol use | Amygdala                            | No difference                  | No difference                                 |
|     |                   |                                                                                                                                                    | Bed nucleus of the stria terminalis | No difference                  | No difference                                 |
| (7) | Postmortem humans | 15 Alcohol use disorder<br>15 healthy controls<br>(Tobacco use in 75% in healthy controls and 83% in AUD)<br>RT-PCR analysis                       | Hippocampus                         | <b>Lower</b>                   | No difference<br>(Trend lower)                |
|     |                   |                                                                                                                                                    | Central nucleus of the amygdala     | No difference                  | <b>Lower</b>                                  |
|     |                   |                                                                                                                                                    | Prefrontal cortex                   | No difference                  | No difference                                 |
|     |                   |                                                                                                                                                    | Orbitofrontal cortex                | No difference                  | No difference                                 |
|     |                   |                                                                                                                                                    | Motor cortex                        | No difference                  | No difference                                 |

|     |                   |                                                                                                                             |                                  |               |               |
|-----|-------------------|-----------------------------------------------------------------------------------------------------------------------------|----------------------------------|---------------|---------------|
| (8) | Postmortem humans | 27 substance use disorders (56% AUD, 22% AUD + another SUD and 22% other substance use disorder)<br><br>53 healthy controls | Anterior insula                  | No difference | No difference |
|     |                   |                                                                                                                             | Mediodorsal thalamus             | No difference | No difference |
|     |                   |                                                                                                                             | Dorsal anterior cingulate cortex | No difference | No difference |

## Supplement analyses

### 1. Effect of sex on [<sup>11</sup>C]NOP-1A V<sub>T</sub>

[<sup>11</sup>C]NOP-1A V<sub>T</sub> was not significantly different between AUD and HC when sex was included as a factor in the linear mixed model (effect of diagnosis,  $F(1, 50) = 0.01$ ,  $p = 0.98$ ; effect of sex,  $F(1, 50) = 5.32$ ,  $p = 0.03$ ; effect of sex X diagnosis,  $F(1, 50) = 0.25$ ,  $p = 0.62$ ). Females had significantly lower V<sub>T</sub> compared to males, as previously reported in (9), but not in (10).

### 2. Effect of tobacco use status on [<sup>11</sup>C]NOP-1A V<sub>T</sub>

[<sup>11</sup>C]NOP-1A V<sub>T</sub> was not significantly different between AUD and HC when tobacco use status was included as a factor in the linear mixed model (effect of diagnosis,  $F(1, 50) = 0.26$ ,  $p = 0.62$ ; effect of tobacco use,  $F(1, 50) = 3.29$ ,  $p = 0.08$ ; effect of tobacco use X diagnosis,  $F(1, 50) = 1.22$ ,  $p = 0.28$ ). Higher V<sub>T</sub> in tobacco users compared to non-users, which is at trend-level in the LMM is shown in **Table S2**.

### 3. Effect of comorbid psychiatric/chronic pain disorders on [<sup>11</sup>C]NOP-1A V<sub>T</sub> in AUD

[<sup>11</sup>C]NOP-1A V<sub>T</sub> was not significantly different between AUD with (n=7) and without (n=20) comorbid psychiatric/chronic pain disorders (effect of comorbid disorders,  $F(1, 25) = 0.03$ ,  $p = 0.86$ ; effect of region,  $F(10, 250) = 168.47$ ,  $p < 0.001$ ; effect of region X comorbid disorders,  $F(10, 250) = 0.83$ ,  $p = 0.60$ ).

### 4. Effect of psychotropic medications on [<sup>11</sup>C]NOP-1A V<sub>T</sub> in AUD

[<sup>11</sup>C]NOP-1A V<sub>T</sub> was not significantly different between AUD off- (n=19) and on- (n=8) and psychotropic medications (effect of psychotropic medications,  $F(1, 25) = 0.01$ ,  $p = 0.92$ ; effect of region,  $F(10, 250) = 190.90$ ,  $p < 0.001$ ; effect of region X psychotropic medications,  $F(10, 250) = 0.63$ ,  $p = 0.79$ ).

## Supplement Figures

**Figure S1** shows the positive relationship (which failed to survive a multiple comparison correction) between number of abstinent days prior to the scan and ventral striatum  $V_T$  in  $n=27$  AUD subjects.

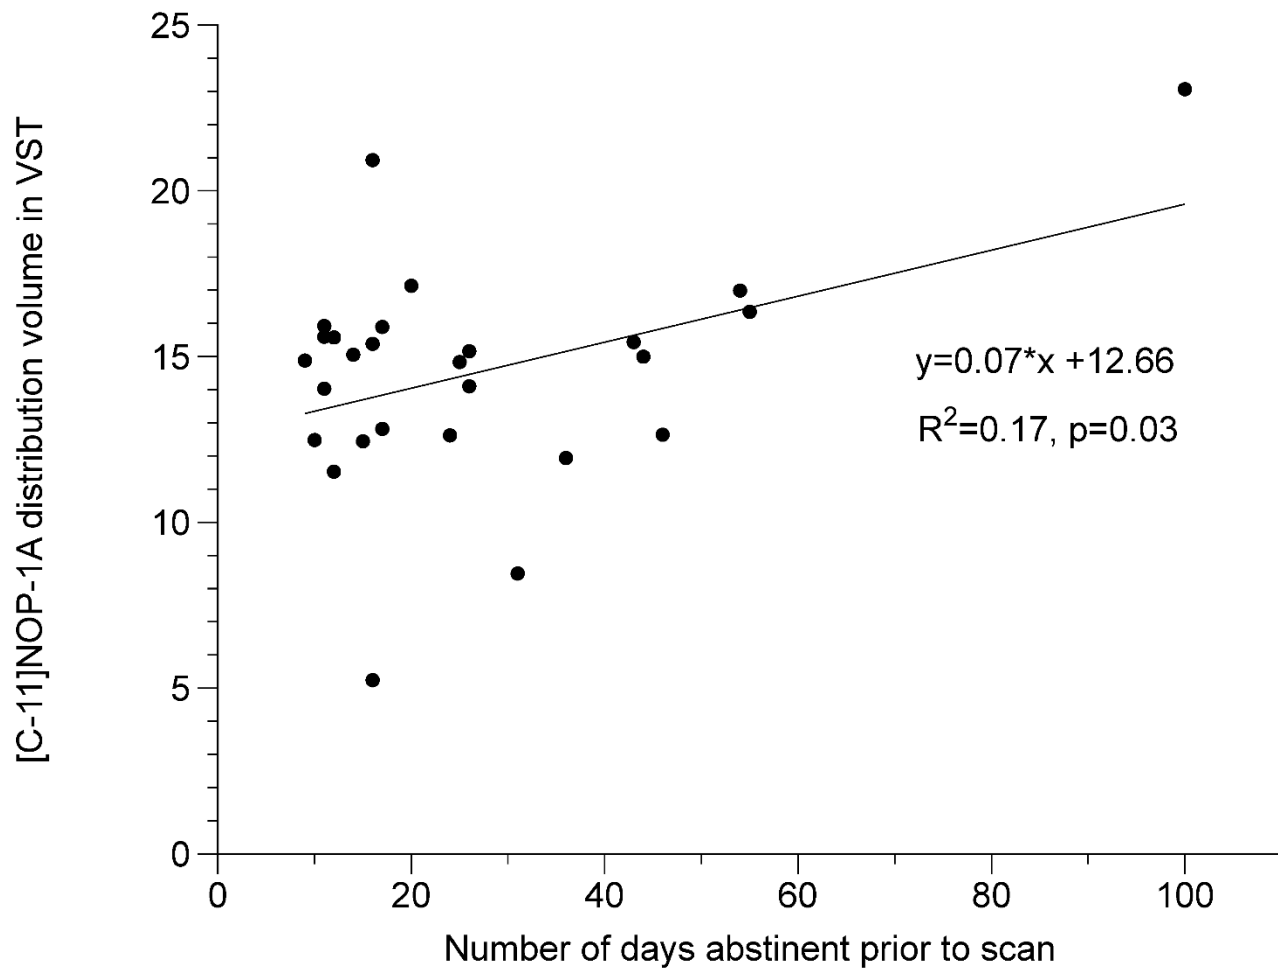

**Figure S2** shows the negative association between the number of drinking days in the month prior to enrollment and orbitofrontal cortex  $V_T$  in  $n=27$  AUD subjects.

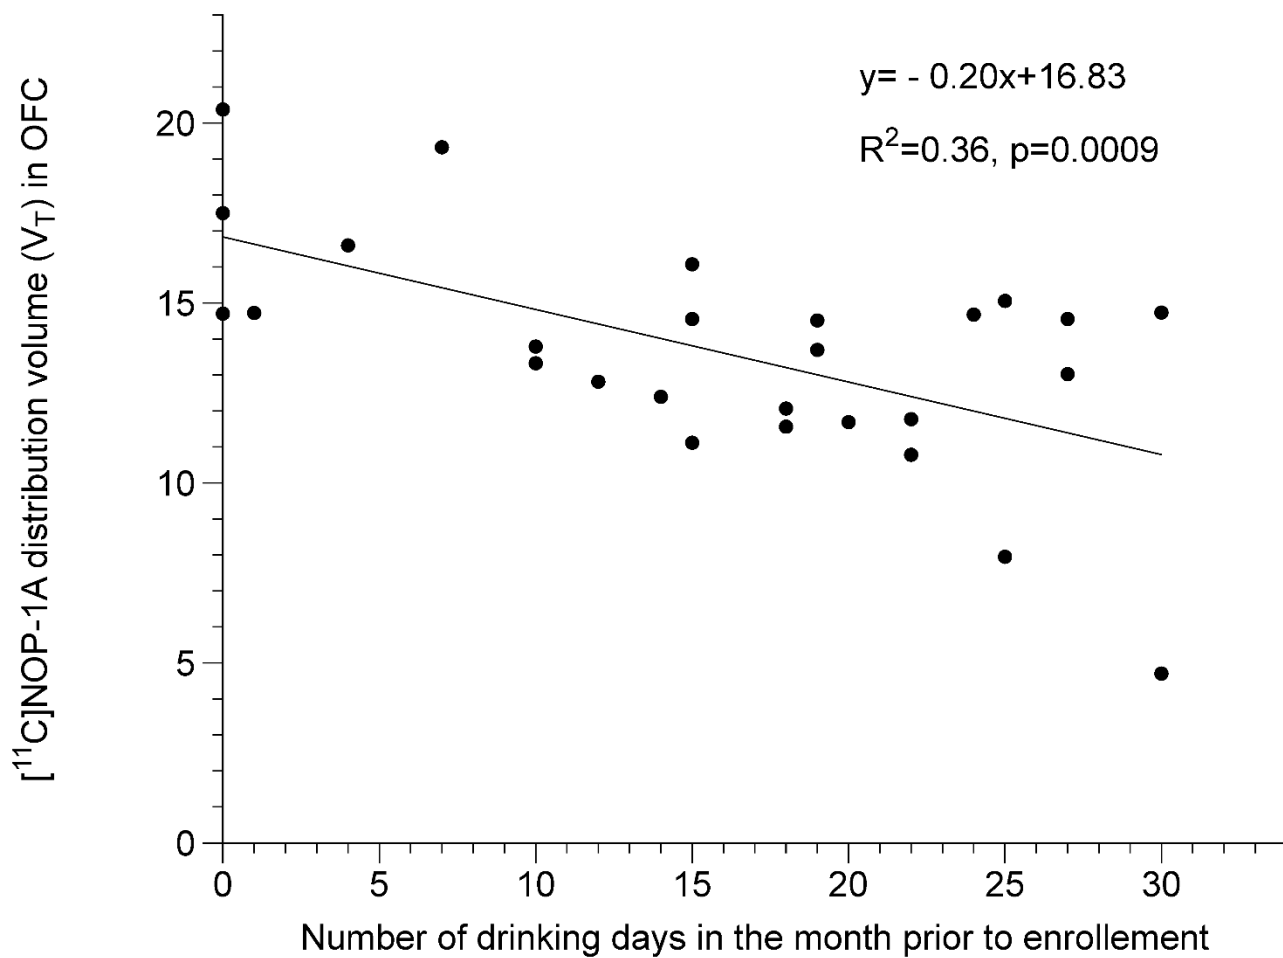

**Figure S3** shows the negative association between the mean number of drinks consumed per drinking day in the month prior to enrollment and the orbitofrontal cortex  $V_T$  in  $n=27$  AUD subjects.

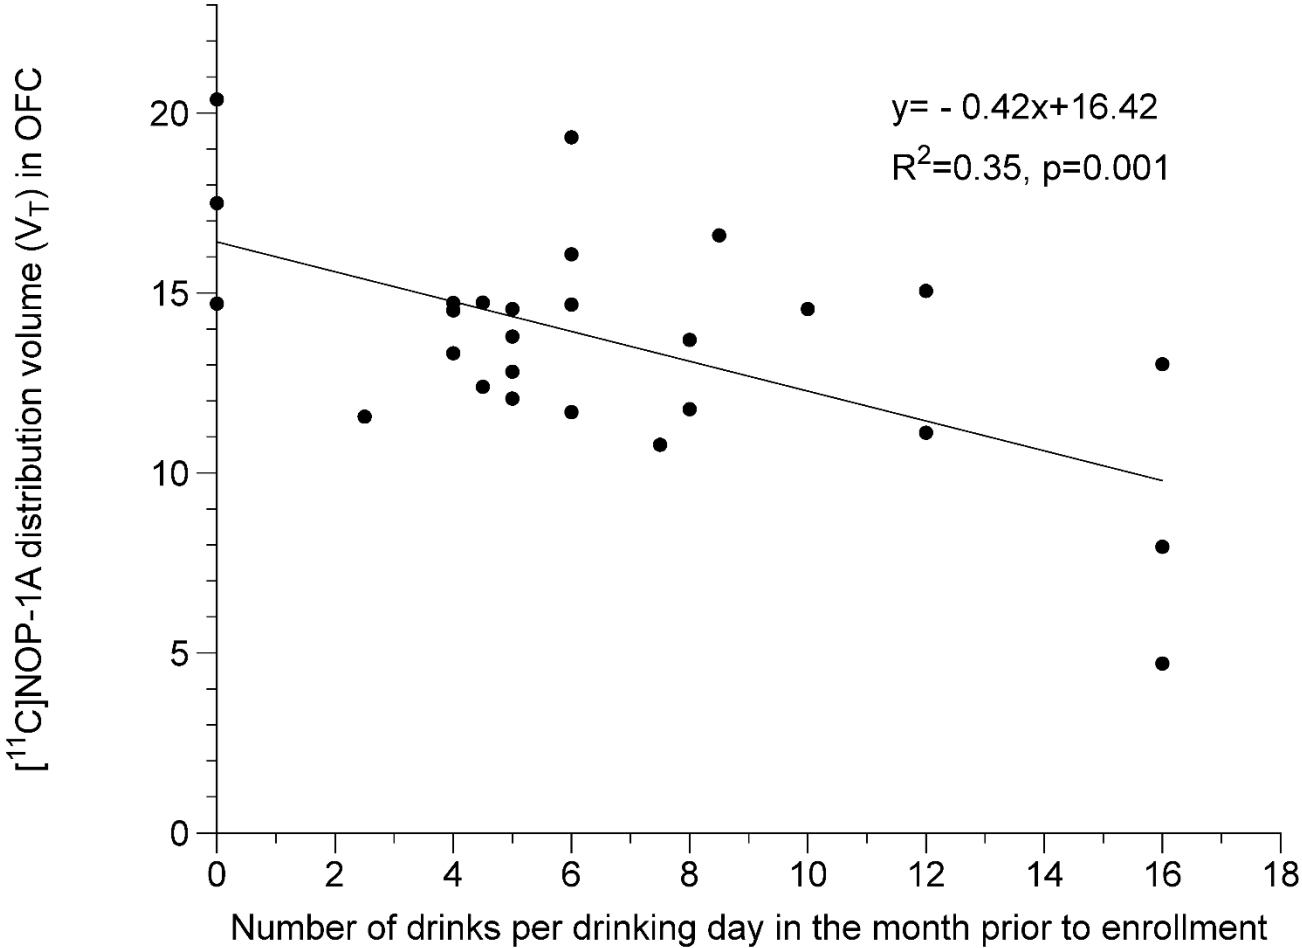



## Supplement References

1. Aujla H, Cannarsa R, Romualdi P, Ciccocioppo R, Martin-Fardon R, Weiss F (2013): Modification of anxiety-like behaviors by nociceptin/orphanin FQ (N/OFQ) and time-dependent changes in N/OFQ-NOP gene expression following ethanol withdrawal. *Addict Biol.* 18:467-479.
2. D'Addario C, Caputi FF, Rimondini R, Gandolfi O, Del Borrello E, Candeletti S, et al. (2013): Different alcohol exposures induce selective alterations on the expression of dynorphin and nociceptin systems related genes in rat brain. *Addict Biol.* 18:425-433.
3. Ploj K, Roman E, Gustavsson L, Nylander I (2000): Basal levels and alcohol-induced changes in nociceptin/orphanin FQ, dynorphin, and enkephalin levels in C57BL/6J mice. *Brain Res Bull.* 53:219-226.
4. Bellia F, Fernandez MS, Fabio MC, Pucci M, Pautassi RM, D'Addario C (2020): Selective alterations in endogenous opioid system genes expression in rats selected for high ethanol intake during adolescence. *Drug Alcohol Depend.* 212:108025.
5. Economidou D, Hansson AC, Weiss F, Terasmaa A, Sommer WH, Cippitelli A, et al. (2008): Dysregulation of nociceptin/orphanin FQ activity in the amygdala is linked to excessive alcohol drinking in the rat. *Biol Psychiatry.* 64:211-218.
6. Caputi FF, Stopponi S, Rullo L, Palmisano M, Ubaldi M, Candeletti S, et al. (2021): Dysregulation of Nociceptin/Orphanin FQ and Dynorphin Systems in the Extended Amygdala of Alcohol Preferring Marchigian Sardinian (msP) Rats. *Int J Mol Sci.* 22.
7. Kuzmin A, Bazov I, Sheedy D, Garrick T, Harper C, Bakalkin G (2009): Expression of pronociceptin and its receptor is downregulated in the brain of human alcoholics. *Brain Res.* 1305 Suppl:S80-85.
8. Lutz PE, Zhou Y, Labbe A, Mechawar N, Turecki G (2015): Decreased expression of nociceptin/orphanin FQ in the dorsal anterior cingulate cortex of suicides. *Eur Neuropsychopharmacol.* 25:2008-2014.
9. Narendran R, Tollefson S, Himes ML, Paris J, Lopresti B, Ciccocioppo R, et al. (2019): Nociceptin Receptors Upregulated in Cocaine Use Disorder: A Positron Emission Tomography Imaging Study Using [(11)C]NOP-1A. *Am J Psychiatry.* 176:468-476.
10. Flanigan M, Tollefson S, Himes ML, Jordan R, Roach K, Stoughton C, et al. (2020): Acute Elevations in Cortisol Increase the In Vivo Binding of [(11)C]NOP-1A to Nociceptin Receptors: A Novel Imaging Paradigm to Study the Interaction Between Stress- and Antistress-Regulating Neuropeptides. *Biol Psychiatry.* 87:570-576.
